# Supplementary figures and images for: Electron spectroscopy for chemical analysis of liquids
Source: Royal Society of Chemistry journal article supplement (doi:10.1039/d5sc09061j), 2026-01-01

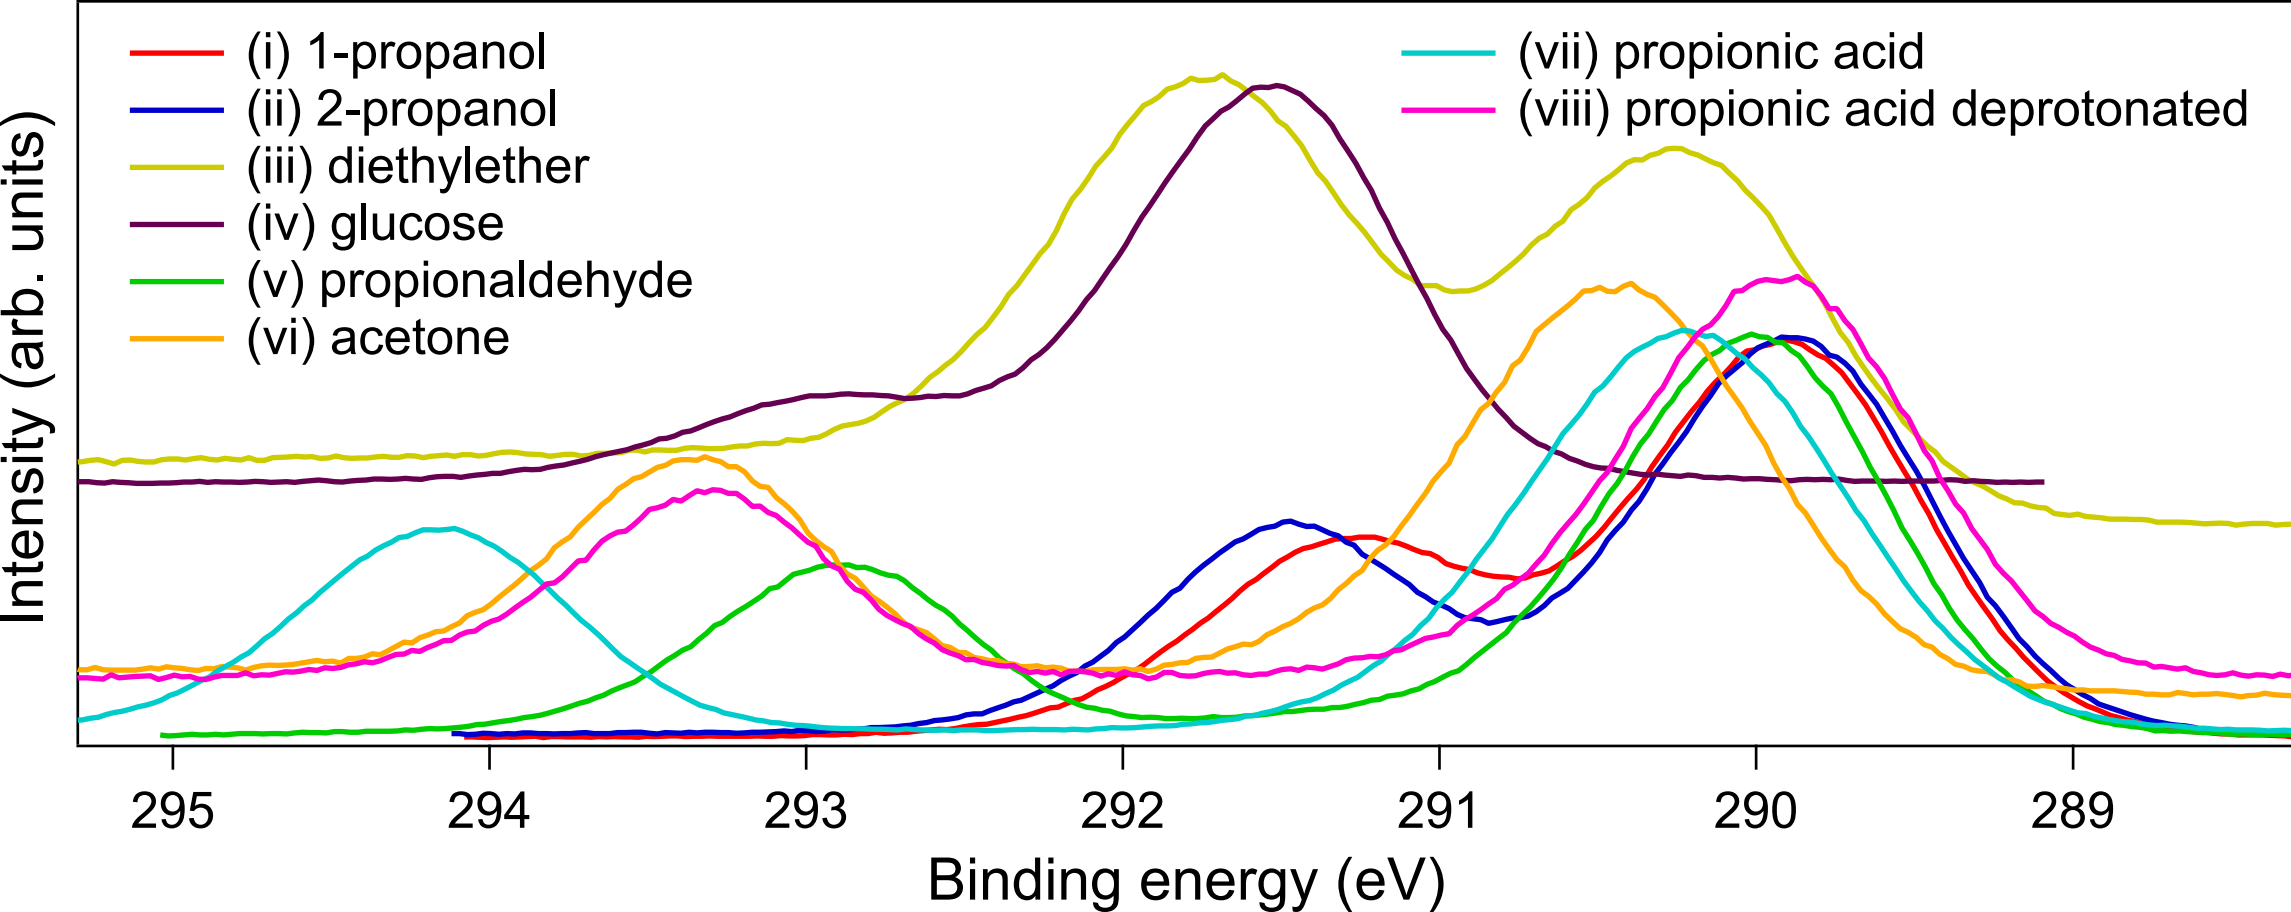

Supplement: d5sc09061j2.zip [file FigS1.pdf › FigS1.pdf]

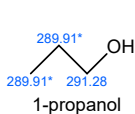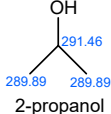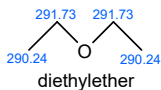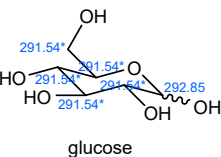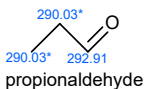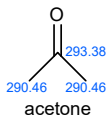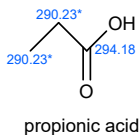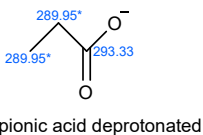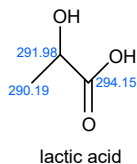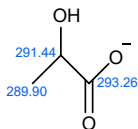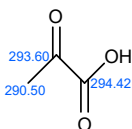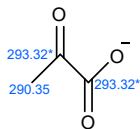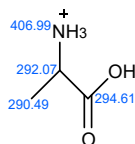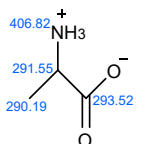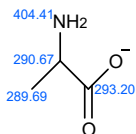

Supplement: d5sc09061j2.zip [file FigS2.pdf › FigS2.pdf]
